# Supplementary material for: Poly I:C Pre-Treatment Induced the Anti-Viral Interferon Response in Airway Epithelial Cells
Source: MDPI journal article supplement (doi:10.3390/v15122328), 2023-11-27
Supplement: s1 [file s1]

**Table S1.** Single data on asthma and control patients.

| Patient ID | Gender | Age (years) | BMI (kg/m <sup>2</sup> ) | Airway infection in the last year | Allergic rhinitis | Asthma medication                 | Family history of atopy/asthma | FEV1 (%) | FVC (%) | FEV1/FVC (%) | Phenotype (PRAC-TALL 2008) |
|------------|--------|-------------|--------------------------|-----------------------------------|-------------------|-----------------------------------|--------------------------------|----------|---------|--------------|----------------------------|
| A1         | male   | 28          | 44,79                    | 2                                 | yes               | ICS+LABA                          | yes                            | 95       | 89      | 87,58        | mixed                      |
| A2         | female | 33          | 24,68                    | 1                                 | yes               | ICS+LABA                          | no                             | 126      | 120     | 86,81        | allergic                   |
| A3         | male   | 63          | 29,3                     | 0                                 | yes               | ICS+LABA+ Reproterol+ Cromoglycin | yes                            | 89       | 98      | 69,17        | allergic                   |
| A4         | male   | 53          | 25,31                    | 0                                 | yes               | ICS+LABA                          | yes                            | 80       | 90      | 70,34        | mixed                      |
| A5         | male   | 57          | 33,21                    | 0                                 | no                | ICS+LABA                          | yes                            | 76       | 91      | 64,24        | mixed                      |
| A6         | female | 47          | 29,07                    | 3                                 | no                | ICS+LABA                          | yes                            | 113      | 102     | 88,09        | mixed                      |
| A7         | female | 40          | 25,7                     | 3                                 | no                | ICS+LABA                          | no                             | 84       | 89      | 77,67        | mixed                      |
| A8         | male   | 60          | 25,6                     | 0                                 | yes               | no                                | yes                            | 99       | 109     | 69,79        | allergic                   |
| A9         | female | 44          | 24,5                     | 0                                 | no                | ICS+LABA                          | no                             | 82       | 81      | 81,84        | mixed                      |
| A10        | female | 51          | 27,9                     | 1                                 | yes               | ICS+LABA                          | no                             | 91       | 96      | 75,51        | allergic                   |
| A11        | male   | 26          | 25,8                     | 4                                 | no                | no                                | yes                            | 74       | 90      | 65,23        | allergic                   |
| A12        | female | 56          | 25,7                     | 1                                 | yes               | no                                | no                             | 86       | 86      | 79,15        | mixed                      |
| A13        | male   | 31          | 21,8                     | 2                                 | yes               | ICS+LABA                          | yes                            | 100      | 101     | 81,65        | mixed                      |
| A14        | male   | 25          | 22,79                    | 0                                 | yes               | ICS                               | yes                            | 97       | 86      | 94,54        | allergic                   |
| A15        | female | 47          | 25,62                    | 2                                 | yes               | ICS+LABA                          | yes                            | 89       | 85      | 82,79        | allergic                   |
| A16        | female | 26          | 22,46                    | 6                                 | yes               | no                                | no                             | 96       | 105     | 77,94        | mixed                      |
| A17        | female | 54          | 21,97                    | 0                                 | yes               | ICS+LABA                          | no                             | 96       | 98      | 77,25        | allergic                   |
| A18        | female | 47          | 26,18                    | 0                                 | yes               | ICS+LABA                          | no                             | 117      | 119     | 78,82        | allergic                   |
| A19        | female | 24          | 23,03                    | 1                                 | yes               | ICS+LABA                          | no                             | 104      | 105     | 84,6         | mixed                      |
| A20        | male   | 23          | 29,18                    | 1                                 | yes               | no                                | yes                            | 91       | 101     | 75,16        | allergic                   |
| A21        | male   | 41          | 30,15                    | 0                                 | yes               | ICS+LABA                          | no                             | 77       | 84      | 72,05        | allergic                   |
| A22        | female | 52          | 23,8                     | 3                                 | yes               | ICS+LABA                          | yes                            | 104      | 94      | 87,85        | allergic                   |
| C1         | female | 34          | 23,05                    | 0                                 | no                | no                                | yes                            | 96       | 90      | 88,87        | /                          |
| C2         | female | 33          | 20,58                    | 0                                 | no                | no                                | no                             | 111      | 105     | 88           | /                          |
| C3         | female | 29          | 18,26                    | 1                                 | no                | no                                | no                             | 84       | 80      | 89,12        | /                          |
| C4         | female | 44          | 21,95                    | 0                                 | no                | no                                | no                             | 104      | 104     | 80,18        | /                          |
| C5         | male   | 62          | 21                       | 2                                 | no                | no                                | no                             | 96       | 96      | 76,98        | /                          |
| C6         | male   | 64          | 29,3                     | 1                                 | no                | no                                | no                             | 126      | 116     | 82,84        | /                          |
| C7         | male   | 26          | 27,7                     | 1                                 | no                | no                                | no                             | 87       | 94      | 76,12        | /                          |
| C8         | female | 23          | 21,5                     | 2                                 | no                | no                                | yes                            | 90       | 99      | 77,64        | /                          |
| C9         | female | 63          | 18,6                     | 2                                 | no                | no                                | yes                            | 99       | 83      | 93,96        | /                          |
| C10        | female | 53          | 24,8                     | 0                                 | no                | no                                | no                             | 110      | 106     | 82,96        | /                          |
| C11        | male   | 55          | 28,4                     | 0                                 | no                | no                                | no                             | 96       | 86      | 85,71        | /                          |
| C12        | male   | 21          | 23,5                     | 0                                 | no                | no                                | yes                            | 100      | 107     | 77,58        | /                          |
| C13        | female | 22          | 20,4                     | 2                                 | no                | no                                | no                             | 102      | 91      | 97,24        | /                          |
| C14        | male   | 31          | 32,5                     | 0                                 | no                | no                                | no                             | 111      | 104     | 87,65        | /                          |
| C15        | male   | 25          | 21,1                     | 0                                 | no                | no                                | no                             | 93       | 106     | 71,81        | /                          |
| C16        | male   | 43          | 28,4                     | 0                                 | no                | no                                | no                             | 116      | 111     | 84,06        | /                          |
| C17        | female | 28          | 17,15                    | 0                                 | no                | no                                | no                             | 86       | 102     | 71,85        | /                          |
| C18        | female | 61          | 22,32                    | 0                                 | no                | no                                | no                             | 106      | 97      | 85,49        | /                          |
| C19        | male   | 24          | 26,44                    | 2                                 | no                | no                                | no                             | 98       | 117     | 69,38        | /                          |

**Table S2.** Cell culture reagents used in this study.

| Product                                                                      | Company                          | Catalog number |
|------------------------------------------------------------------------------|----------------------------------|----------------|
| RPMI 1640 Medium, no glucose                                                 | Gibco™, Thermo Fisher Scientific | 11879020       |
| UTM tubes                                                                    | Copan                            | 330C           |
| DNAase I                                                                     | Sigma-Aldrich                    | 10104159001    |
| Collagen R 2mg/ml                                                            | Serva                            | 47254          |
| 48 Well Cell Culture Multiwell Plate,<br>CELLSTAR®, with Lid                 | Greiner Bio-one                  | 677180         |
| PneumoCult™-Ex-Plus Medium                                                   | Stemcell™ Technologies           | 05040          |
| Antibiotic-Antimycotic (100X)                                                | Gibco™ Thermo Fisher Scientific  | 11570486       |
| Gentamicin (10mg/ml)                                                         | Sigma-Aldrich                    | G1272          |
| FBS Superior                                                                 | Sigma-Aldrich                    | S0615          |
| Sodium Bicarbonat 7,5%                                                       | Gibco™ Thermo Fisher Scientific  | 25080060       |
| 6 Well Cell Culture Multiwell Plate,<br>CELLSTAR®, with Lid                  | Greiner Bio-one                  | 657160         |
| RPMI 1640 Medium                                                             | Gibco™, Thermo Fisher Scientific | 21875091       |
| RPMI 1640 Medium, no glucose                                                 | Gibco™, Thermo Fisher Scientific | 11879020       |
| Penicillin-Streptomycin Solution<br>100X                                     | Anprotec                         | AC-AB-0024     |
| L-Glutamine 100X, 200mM                                                      | Anprotec                         | AC-AS-0001     |
| Poly I:C (polyinosinic-polycytidylic<br>acid potassium salt)                 | Sigma-Aldrich                    | P9582-50MG     |
| Trypsin-EDTA 1X in PBS w/o Cal-<br>cium w/o Magnesium w/o Phenol<br>Red      | Anprotec                         | AC-EZ-0009     |
| Trypan Blue Solution                                                         | Sigma-Aldrich                    | T8154          |
| iTaq™ Universal SYBR® Green Su-<br>permix                                    | Bio-Rad Laboratories             | 1725124        |
| QIAzol Lysis® Reagent                                                        | Qiagen (Maryland, USA)           | 79306          |
| RevertAid™ First Strand cDNA Syn-<br>thesis Kit                              | Thermo Scientific™               | K1622          |
| human IL-29/IL-28B (IFN-lambda<br>1/3) DuoSet ELISA                          | R&D Systems                      | DY1598B        |
| PBS (Dulbecco's Phosphate Buffered<br>Saline w/o Calcium w/o Magne-<br>sium) | Anprotec                         | AC-BS-0002     |

**Table S3.** Human qPCR primers.

| Gene    | Primer | Sequence (5' -> 3')            |
|---------|--------|--------------------------------|
| HPRT    | fwd    | TGA CAC TGG CAA AAC AAT GCA    |
|         | rev    | GGT CCT TTT CAC CAG CAA GCT    |
| IFN-α   | fwd    | AGG AGT TTG ATG GCA ACC AG     |
|         | rev    | CTC TCC TCC TGC ATC ACA CA     |
| IFN-β   | fwd    | AGT AGG CGA CAC TGT TCG TG     |
|         | rev    | AGC CTC CCA TTC AAT TGC CA     |
| IFN-λ   | fwd    | CTG CCA CAT AGC CCA GTT CA     |
|         | rev    | AGC GAC TCT TCT AAG GCA TCT    |
| IFNαRII | fwd    | ATG CTT TTG AGC CAG AAT GCC    |
|         | rev    | CAT CTG TGT AAT CAG GCG AAT CA |
| OAS-1   | fwd    | AGC TGG AAG CCT GTC AAA GA     |
|         | rev    | GGT TTA TAG CCG CCA GTC AA     |
| TLR3    | fwd    | GTA TTG CCT GGT TTG TTA ATT GG |
|         | rev    | AAG AGT TCA AAG GGG GCA CT     |
